# Supplementary material for: Effect of solvation on the synthesis of MOF-based microrobots and their targeted-therapy applications
Source: Royal Society of Chemistry journal article supplement (doi:10.1039/d1ma00139f), 2021-01-01
Supplement: d1ma00139f1.pdf [file d1ma00139f1.pdf]

## Effect of solvation on the synthesis of MOFs-based micro/nanorobots and its targeted-therapy applications

Xueliang Mu,<sup>a</sup> Yukun Zhong,<sup>a</sup> Teng Jiang<sup>a</sup> and U Kei Cheang<sup>\*a</sup>

<sup>a</sup> Department of Mechanical and Energy Engineering, Southern University of Science and Technology, Shenzhen, 518055, China

\*corresponding author. E-mail: cheanguk@sustech.edu.cn; Tel.: +86-755-88015352

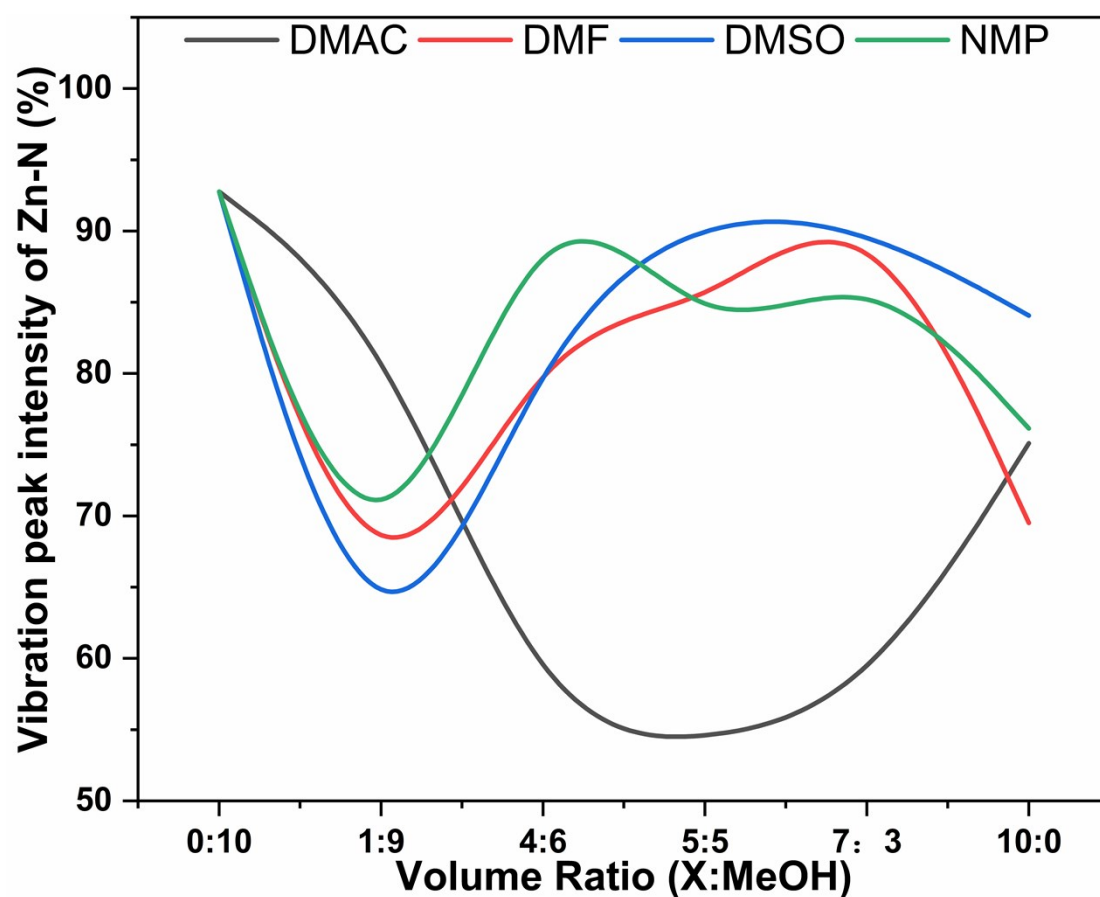

Fig. S1 Volume ratio of the binary solvent system versus vibration peak intensity of Zn-N (near 420 cm<sup>-1</sup>)
